# Supplementary material
Source: PubMed Central journal article supplement (PMC2174421)
Supplement: 97320630002064S1.pdf [file 97320630002064S1.pdf]

## Supplementary material

| S. No. | Database Category (No. of Entries)*                      |
|--------|----------------------------------------------------------|
| 1.     | Nucleotide Sequence Databases (118)                      |
| 2.     | RNA Sequence Databases (61)                              |
| 3.     | Protein Sequence Databases (171)                         |
| 4.     | Structure Databases (105)                                |
| 5.     | Genomics Databases (non-vertebrate) (243)                |
| 6.     | Metabolic & Signaling Pathways (86)                      |
| 7.     | Human and other Vertebrate Genomes (104)                 |
| 8.     | Human Genes and Diseases (120)                           |
| 9.     | Microarray Data and other Gene Expression Databases (60) |
| 10.    | Proteomics Resources (17)                                |
| 11.    | Other Molecular Biology Databases (31)                   |
| 12.    | Organelle Databases (25)                                 |
| 13.    | Plant Databases (94)                                     |
| 14.    | Immunological Databases (37)                             |
| 15.    | Patents Database (2)                                     |

**Table 1:** List of 15 database categories with number of databases under each category is given. \* Database entries are repeated in many cases as they fall simultaneously in more than one category
